# Supplementary material
Source: MDPI journal article supplement (https://www.mdpi.com/2071-1050/13/23/13443)
Supplement: s1 [file s1 › sustainability-1456795-supplementary.pdf]

## SUPPORTING INFO

### Antioxidant Activity of MAE extracts

$$Y = \text{CumNorm}(1.42625 * \text{Log}(X) + 1.6467)$$

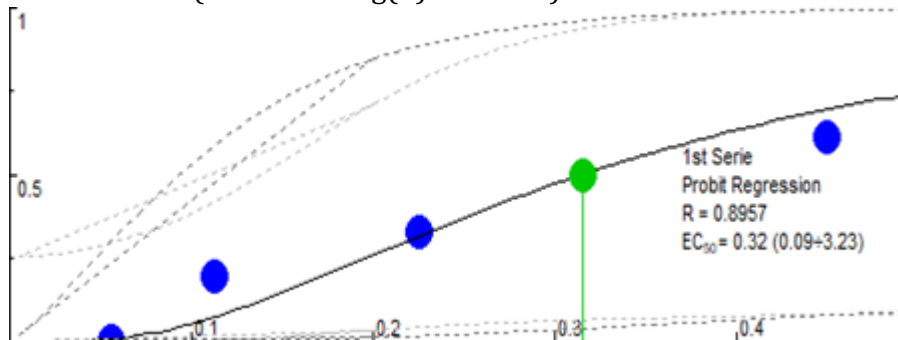

**Figure S1.** DPPH assay for MAE extract of *Sargassum muticum*. Probit regression, relative equation and EC50 value. Measurements were performed according to Paragraph 2.5 in the Experimental Section.

$$Y = \text{CumNorm}(0.479343 * \text{Log}(X) + 0.24363)$$

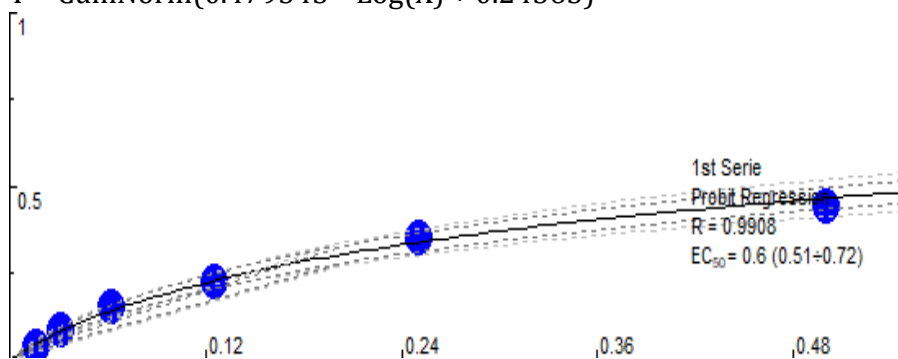

**Figure S2.** DPPH assay for MAE extract of *Ulva lactuca*. Probit regression, relative equation and EC50 value. Measurements were performed according to Paragraph 2.5 in the Experimental Section.

$$Y = \text{CumNorm}(0.4342 * \text{Log}(X) - 0.7177)$$

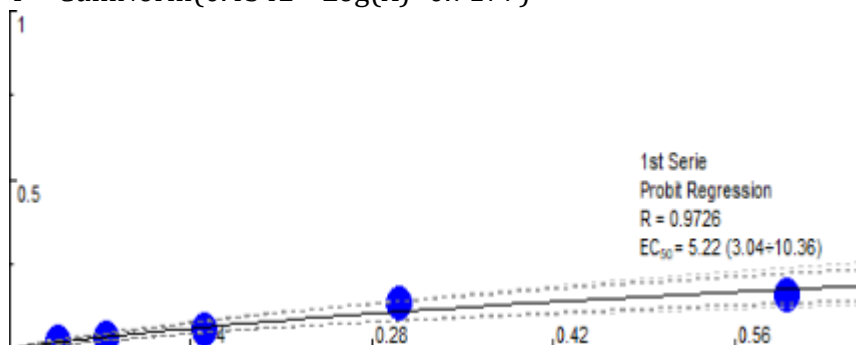

**Figure S3.** DPPH assay for MAE extract of *Solieria filiformis*. Probit regression, relative equation and EC50 value. Measurements were performed according to Paragraph 2.5 in the Experimental Section.

**Table S1.** Base and formulates materials.

| Material                                                    | Formula                                                                              | INCI                               |
|-------------------------------------------------------------|--------------------------------------------------------------------------------------|------------------------------------|
| MilliQ water                                                | 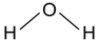    | AQUA                               |
| Tetrahydroxysilane<br>(TEOS) <i>reagent grade, 98%</i>      | 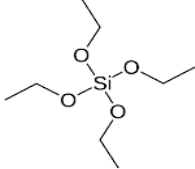    | SILICA                             |
| Methyltriethoxysilane<br>(MTES) <i>technical grade, 90%</i> | 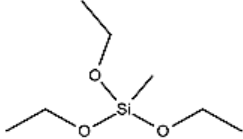    | SILICA                             |
| Glycolic acid, 99%                                          | 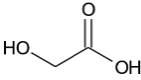    | GLYCOLIC ACID                      |
| Chitosan                                                    | 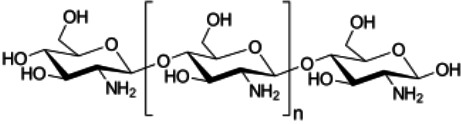  | CHITOSAN                           |
| Sodium Alginate                                             | 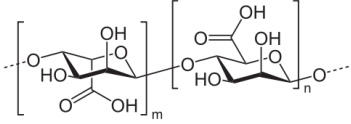  | NATRII ALGINAS                     |
| Pectin (E 440)                                              | 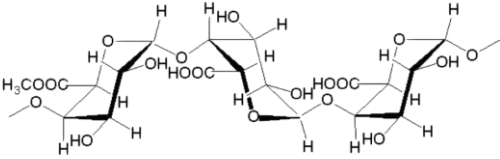 | PECTIN                             |
| Guar gum, Jaguar HP-105                                     | 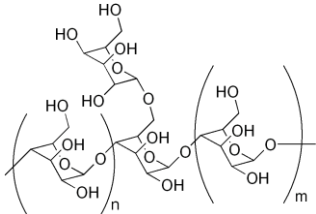  | CYAMOPSIS<br>TETRAGONOLOBUS<br>GUM |
| Algal Extract                                               | -                                                                                    | (...) EXTRACT                      |
| Extravirgin Olive Oil Bio<br>(EVOO)                         | -                                                                                    | OLEA EUROPAEA<br>FRUIT OIL         |
| Sodium Chloride                                             | NaCl                                                                                 | SODIUM CHLORIDE                    |

**Fattyilan V (Vegetal)**

-

CETEARYL ALCOHOL,  
CETEARETH-3,  
HYDROGENATED  
VEGETABLE OIL,  
SODIUM LAURYL  
SULFATE

**Table S2.** Thermogravimetric analysis of MAE extract.

| Samples                    | <i>Water</i><br>(%) | <i>Organic</i><br>(%) | <i>Ashes</i><br>(%) | Dehydrated            |                     |
|----------------------------|---------------------|-----------------------|---------------------|-----------------------|---------------------|
|                            |                     |                       |                     | <i>Organic</i><br>(%) | <i>Ashes</i><br>(%) |
| <i>Sargassum muticum</i>   | 5,65                | 72,08                 | 22,27               | 76,40                 | 23,60               |
| <i>Ulva lactuca</i>        | 7,34                | 49,59                 | 43,07               | 53,52                 | 46,48               |
| <i>Solieria filiformis</i> | 30,95               | 65,11                 | 3,94                | 94,29                 | 5,71                |
